# Supplementary material
Source: ML conference proceedings conference paper supplement (https://proceedings.neurips.cc/paper_files/paper/2014/hash/9dfcd5e558dfa04aaf37f137a1d9d3e5-Abstract.html)
Supplement: Supplementary file [file 9dfcd5e558dfa04aaf37f137a1d9d3e5-Supplemental.zip]

Appendix to *Sensory Integration and Density Estimation*

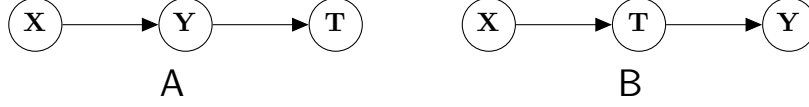

Figure 1: Two Markov chains. (A)  $\mathbf{X}$  and  $\mathbf{T}$  are conditionally independent given  $\mathbf{Y}$ . (B)  $\mathbf{X}$  and  $\mathbf{Y}$  are conditionally independent given  $\mathbf{T}$ .

**A theorem relating posterior distributions and mutual information.** Suppose (premises) that  $\mathbf{t} = f(\mathbf{y})$ , not necessarily invertible, and  $\mathbf{y} \sim p(\mathbf{y}|\mathbf{x})$ . Then:

$$\mathcal{I}(\mathbf{X}; \mathbf{Y}) = \mathcal{I}(\mathbf{X}; \mathbf{T}) \iff \Pr[\mathbf{X}|\mathbf{Y}] = \Pr[\mathbf{X}|\mathbf{T}]. \quad (1)$$

*Proof.*

$$\begin{aligned} \mathcal{I}(\mathbf{X}; \mathbf{Y}, \mathbf{T}) &= \mathcal{I}(\mathbf{X}; \mathbf{T}) + \mathcal{I}(\mathbf{X}; \mathbf{Y}|\mathbf{T}) && \text{(chain rule of mutual information)} \\ &= \mathcal{I}(\mathbf{X}; \mathbf{Y}) + \mathcal{I}(\mathbf{X}; \mathbf{T}|\mathbf{Y}) && \text{(chain rule of mutual information).} \end{aligned}$$

Now the premises imply that  $\mathbf{X} \rightarrow \mathbf{Y} \rightarrow \mathbf{T}$  (a Markov chain; Fig. 1A), so  $\mathcal{I}(\mathbf{X}; \mathbf{T}|\mathbf{Y}) = 0$ . That means that

$$\mathcal{I}(\mathbf{X}; \mathbf{T}) = \mathcal{I}(\mathbf{X}; \mathbf{Y}) \iff \mathcal{I}(\mathbf{X}; \mathbf{Y}|\mathbf{T}) = 0.$$

But:

$$\mathcal{I}(\mathbf{X}; \mathbf{Y}|\mathbf{T}) = 0 \iff \mathbf{X} \rightarrow \mathbf{T} \rightarrow \mathbf{Y} \quad \text{(a Markov chain; Fig. 1B).}$$

The two Markov chains (Fig. 1) are equivalent to:

$$\begin{aligned} \Pr[\mathbf{X}|\mathbf{Y}, \mathbf{T}] &= \Pr[\mathbf{X}|\mathbf{Y}], \\ \Pr[\mathbf{X}|\mathbf{Y}, \mathbf{T}] &= \Pr[\mathbf{X}|\mathbf{T}]. \end{aligned}$$

Since the premises imply that the first equality always holds, we have

$$\mathcal{I}(\mathbf{X}; \mathbf{Y}|\mathbf{T}) = 0 \iff \Pr[\mathbf{X}|\mathbf{Y}] = \Pr[\mathbf{X}|\mathbf{T}].$$

Stringing the biconditionals together gives the theorem.  $\square$
